# Supplementary material for: Syntheses, structures and magnetic properties of nine coordination polymers based on terphenyl-tetracarboxylic acid ligands
Source: Royal Society of Chemistry journal article supplement (doi:10.1039/c6dt04270h), 2016-11-30
Supplement: c6dt04270h1.pdf [file c6dt04270h1.pdf]

## Supporting Information

### Syntheses, Structures and Magnetic Properties of Nine Coordination Polymers Based on Terphenyl-Tetracarboxylic Acid Ligand

Xinhui Zhou,<sup>\*a</sup> Qianqian Chen,<sup>a</sup> Baolin Liu,<sup>\*b</sup> Liang Li,<sup>a</sup> Tao Yang,<sup>a</sup> and Wei  
Huang<sup>\*c</sup>

<sup>a</sup> Key Laboratory for Organic Electronics and Information Displays & Institute of Advanced Materials, Nanjing  
University of Posts & Telecommunications, Nanjing 210023, China. E-mail: iamxhzhou@njupt.edu.cn

<sup>b</sup> Henan Key Laboratory of Polyoxometalate Chemistry, Institute of Molecular and Crystal Engineering, College of  
Chemistry and Chemical Engineering, Henan University, Kaifeng 475004, China. E-mail: blliu@henu.edu.cn

<sup>c</sup> Key Laboratory of Flexible Electronics (KLOFE) & Institute of Advanced Materials (IAM),

Jiangsu National Synergetic Innovation Center for Advanced Materials (SICAM), Nanjing Tech University

(NanjingTech), Nanjing 211816, China. E-mail: iamwhuang@njtech.edu.cn

Table S1. Selected bond lengths (Å) and bond angles (°) for **1**.

|             |           |            |           |
|-------------|-----------|------------|-----------|
| Mn1-O1      | 2.172(1)  | Mn1-O5i    | 2.178(1)  |
| Mn1-O6      | 2.107(1)  | Mn1-O10    | 2.196(1)  |
| Mn1-N1      | 2.308(1)  | Mn1-N2     | 2.280(1)  |
| C13-O1      | 1.249(2)  | C13-O2     | 1.274(2)  |
| C20-O3      | 1.204 (2) | C20-O4     | 1.343(2)  |
| C25-O5      | 1.254 (2) | C25-O6     | 1.258(2)  |
| C34-O7      | 1.321(2)  | C34-O8     | 1.229(2)  |
| C35-O9      | 1.280(2)  | C35-O10    | 1.243(2)  |
| C45-O11     | 1.238(2)  | C45-O12    | 1.306(2)  |
| O6-Mn1-O1   | 87.44(4)  | O5i-Mn1-N2 | 85.98(4)  |
| O6-Mn1-O5i  | 105.49(4) | O10-Mn1-N2 | 85.91(4)  |
| O1-Mn1-O5i  | 111.64(4) | O6-Mn1-N1  | 92.03(4)  |
| O6-Mn1-O10  | 173.23(4) | O1-Mn1-N1  | 90.39(4)  |
| O1-Mn1-O10  | 94.66(4)  | O5i-Mn1-N1 | 152.03(4) |
| O5i-Mn1-O10 | 79.74(4)  | O10-Mn1-N1 | 81.53(4)  |
| O6-Mn1-N2   | 90.13(4)  | N2-Mn1-N1  | 72.09(4)  |

|                   |           |          |          |              |
|-------------------|-----------|----------|----------|--------------|
| O1-Mn1-N2         | 162.22(4) |          |          |              |
| D-H...A           | d(D-H)    | d(H...A) | d(D...A) | $\angle$ DHA |
| O(2)-H(9A)...O(9) | 1.158     | 1.296    | 2.436(1) | 165.91(6)    |

Symmetry code:  $i = 1 - x, -y, -z$ .

Table S2. Selected bond lengths (Å) and bond angles (°) for **2**.

|              |          |             |          |
|--------------|----------|-------------|----------|
| Ni1-O1       | 2.031(4) | Ni1-O2i     | 2.004(4) |
| Ni1-O3ii     | 2.050(4) | Ni1-O5      | 2.088(3) |
| Ni1-N1       | 2.115(5) | Ni1-N2      | 2.054(6) |
| O2i-Ni1-O1   | 97.8(2)  | N2-Ni1-O5   | 175.1(2) |
| O2i-Ni1-O3ii | 171.7(2) | O2i-Ni1-N1  | 87.9(2)  |
| O1-Ni1-O3ii  | 89.2(2)  | O1-Ni1-N1   | 169.6(2) |
| O2i-Ni1-N2   | 89.9(2)  | O3ii-Ni1-N1 | 84.5(2)  |
| O1-Ni1-N2    | 90.1(2)  | N2-Ni1-N1   | 81.1(2)  |
| O3ii-Ni1-N2  | 85.7(2)  | O5-Ni1-N1   | 94.9(2)  |
| O2i-Ni1-O5   | 92.7(1)  | Ni1-O5-Ni1i | 113.6(2) |
| O1-Ni1-O5    | 93.6(1)  | O3ii-Ni1-O5 | 91.2(2)  |

Symmetry codes:  $i = -x, y, 1.5 - z$ ;  $ii = 0.5 + x, -0.5 + y, z$ .

Table S3. Selected bond lengths (Å) and bond angles (°) for **3**.

|           |           |           |          |
|-----------|-----------|-----------|----------|
| Mn1-O1    | 2.157(4)  | Mn2-O2    | 2.155(4) |
| Mn1-O3    | 2.154(3)  | Mn2-O4    | 2.198(3) |
| Mn1-O5    | 2.161(4)  | Mn2-O6    | 2.133(4) |
| Mn1-O8    | 2.134(4)  | Mn2-O7    | 2.184(4) |
| Mn1-N1    | 2.346(6)  | Mn2-N3    | 2.358(5) |
| Mn1-N2    | 2.316(6)  | Mn2-N4    | 2.305(5) |
| O8-Mn1-O3 | 162.78(2) | O6-Mn2-O2 | 157.7(2) |
| O8-Mn1-O1 | 85.9(2)   | O6-Mn2-O7 | 81.9(2)  |
| O3-Mn1-O1 | 86.0(2)   | O2-Mn2-O7 | 93.8(2)  |
| O8-Mn1-O5 | 83.2(2)   | O6-Mn2-O4 | 83.4(2)  |
| O3-Mn1-O5 | 91.8(2)   | O2-Mn2-O4 | 83.0(2)  |
| O1-Mn1-O5 | 135.1(2)  | O7-Mn2-O4 | 130.5(2) |
| O8-Mn1-N2 | 111.6(2)  | O6-Mn2-N4 | 86.5(2)  |
| O3-Mn1-N2 | 83.9(2)   | O2-Mn2-N4 | 109.2(2) |
| O1-Mn1-N2 | 141.6(2)  | O7-Mn2-N4 | 142.0(2) |
| O5-Mn1-N2 | 82.3(2)   | O4-Mn2-N4 | 83.2(2)  |
| O8-Mn1-N1 | 76.5(2)   | O6-Mn2-N3 | 109.2(2) |
| O3-Mn1-N1 | 117.5(2)  | O2-Mn2-N3 | 91.4(2)  |
| O1-Mn1-N1 | 83.2(2)   | O7-Mn2-N3 | 79.9(2)  |

|           |          |           |          |
|-----------|----------|-----------|----------|
| O5-Mn1-N1 | 135.1(2) | O4-Mn2-N3 | 149.3(2) |
| N2-Mn1-N1 | 69.2(2)  | N4-Mn2-N3 | 70.1(2)  |

Table S4. Selected bond lengths (Å) and bond angles (°) for **4**.

|                |            |               |            |
|----------------|------------|---------------|------------|
| Co1-O2         | 2.0837(17) | Co1-O2i       | 2.0837(17) |
| Co1-O3ii       | 2.0104(18) | Co1-O3iii     | 2.0104(18) |
| Co1-O5         | 2.1880(18) | Co1-O5i       | 2.1880(18) |
| Co2-O1         | 2.0424(17) | Co2-O1iv      | 2.0424(17) |
| Co2-O4ii       | 2.0906(18) | Co2-O4v       | 2.0906(18) |
| Co2-O5         | 2.1789(18) | Co2-O5iv      | 2.1789(18) |
| O3ii-Co1-O3iii | 180.00(10) | O3ii-Co1-O2   | 93.50(7)   |
| O3iii-Co1-O2   | 86.50(7)   | O3ii-Co1-O2i  | 86.50(7)   |
| O3iii-Co1-O2i  | 93.50(7)   | O2-Co1-O2i    | 180.0      |
| O3ii-Co1-O5i   | 91.09(8)   | O3iii-Co1-O5i | 88.91(8)   |
| O2-Co1-O5i     | 84.36(7)   | O2i-Co1-O5i   | 95.64(7)   |
| O3ii-Co1-O5    | 88.91(8)   | O3iii-Co1-O5  | 91.09(8)   |
| O2-Co1-O5      | 95.64(7)   | O2i-Co1-O5    | 84.36(7)   |
| O5-Co1-O5i     | 180.0      | O1-Co2-O1iv   | 180.0      |
| O1-Co2-O4ii    | 94.62(7)   | O1iv-Co2-O4ii | 85.38(7)   |
| O1-Co2-O4v     | 85.38(7)   | O1iv-Co2-O4v  | 94.62(7)   |
| O4ii-Co2-O4v   | 180.00(8)  | O1-Co2-O5iv   | 88.15(8)   |
| O1iv-Co2-O5iv  | 91.85(8)   | O4ii-Co2-O5iv | 87.51(7)   |
| O4v-Co2-O5iv   | 92.49(7)   | O1-Co2-O5     | 91.85(8)   |
| O1iv-Co2-O5    | 88.15(8)   | O4ii-Co2-O5   | 92.49(7)   |
| O4v-Co2-O5     | 87.51(7)   | O5-Co2-O5iv   | 180.000(1) |

Symmetry codes: i =  $-x, 2 - y, 1 - z$ ; ii =  $-x, y, 1.5 - z$ ; iii =  $x, 2 - y, -0.5 + z$ ; iv =  $-x, 1 - y, 1 - z$ ; v =  $x, 1 - y, -0.5 + z$ .

Table S5. Selected bond lengths (Å) and bond angles (°) for **5**.

|              |           |             |           |
|--------------|-----------|-------------|-----------|
| Co1-O1       | 2.154(2)  | Co1-O1i     | 2.142(2)  |
| Co1-O3ii     | 2.050(2)  | Co1-O5      | 2.150(2)  |
| Co1-N1       | 2.125(2)  | Co1-N2      | 2.122(2)  |
| O3ii-Co1-N2  | 167.83(9) | O1i-Co1-O5  | 167.74(7) |
| O3ii-Co1-N1  | 90.99(8)  | O3ii-Co1-O1 | 94.64(7)  |
| N2-Co1-N1    | 78.31(9)  | N2-Co1-O1   | 96.06(8)  |
| O3ii-Co1-O1i | 90.30(7)  | N1-Co1-O1   | 174.36(8) |
| N2-Co1-O1i   | 97.60(8)  | O1i-Co1-O1  | 77.83(7)  |
| N1-Co1-O1i   | 102.44(8) | O5-Co1-O1   | 89.92(7)  |
| O3ii-Co1-O5  | 90.19(7)  | N2-Co1-O5   | 84.06(8)  |

|           |          |             |           |
|-----------|----------|-------------|-----------|
| N1-Co1-O5 | 89.80(8) | Co1-O1-Co1i | 102.17(7) |
|-----------|----------|-------------|-----------|

Symmetry codes: i = -x, -y, -z; ii = x, -1 + y, z.

Table S6. Selected bond lengths (Å) and bond angles (°) for **6** and **7**.

|                 | <b>6</b>   | <b>7</b>   |                  | <b>6</b>   | <b>7</b>   |
|-----------------|------------|------------|------------------|------------|------------|
| M1-O2           | 2.0272(19) | 2.081(3)   | M1-O2i           | 2.0272(19) | 2.081(3)   |
| M1-O7vi         | 2.0130(19) | 2.067(3)   | M1-O7vii         | 2.0130(19) | 2.067(3)   |
| M1-O9           | 2.119(2)   | 2.206(3)   | M1-O9i           | 2.119(2)   | 2.206(3)   |
| M2-O1           | 2.0135(19) | 2.040(3)   | M2-O3ii          | 2.0348(19) | 2.060(3)   |
| M2-O6v          | 2.0190(18) | 2.039(3)   | M2-O8vi          | 2.0185(19) | 2.053(3)   |
| M2-O9           | 2.119(2)   | 2.184(3)   | M2-O10           | 2.140(2)   | 2.234(3)   |
| M3-O4ii         | 2.0130(19) | 2.048(3)   | M3-O4iii         | 2.0130(19) | 2.048(3)   |
| M3-O5iv         | 2.0545(17) | 2.067(3)   | M3-O5v           | 2.0545(17) | 2.067(3)   |
| M3-O10          | 2.089(2)   | 2.142(3)   | M3-O10viii       | 2.089(2)   | 2.142(3)   |
| O7vi-M1-O7vii   | 180.00(15) | 180.00(15) | O7vii-M1-O2      | 89.65(8)   | 90.88(13)  |
| O7vi-M1-O2      | 90.35(8)   | 89.12(13)  | O7vii-M1-O2i     | 90.35(8)   | 89.12(13)  |
| O7vi-M1-O2i     | 89.65(8)   | 90.88(13)  | O2-M1-O2i        | 180.0      | 180.0(3)   |
| O7vii-M1-O9     | 89.95(8)   | 91.00(11)  | O7vi-M1-O9       | 90.05(8)   | 89.00(11)  |
| O2-M1-O9        | 93.71(8)   | 93.97(12)  | O2i-M1-O9        | 86.29(8)   | 86.03(12)  |
| O7vii-M1-O9i    | 90.05(8)   | 89.00(11)  | O7vi-M1-O9i      | 89.95(8)   | 91.00(11)  |
| O2-M1-O9i       | 86.29(8)   | 86.03(12)  | O2i-M1-O9i       | 93.70(8)   | 93.97(12)  |
| O9-M1-O9i       | 180.0      | 180.00(15) | O1-M2-O8vi       | 96.42(8)   | 95.65(13)  |
| O1-M2-O6v       | 172.22(8)  | 167.37(13) | O8vi-M2-O6v      | 87.68(8)   | 91.22(13)  |
| O1-M2-O3ii      | 87.67(8)   | 85.48(14)  | O8vi-M2-O3ii     | 174.85(7)  | 176.65(12) |
| O6v-M2-O3ii     | 88.63(8)   | 88.27(13)  | O1-M2-O9         | 95.82(8)   | 98.92(12)  |
| O8vi-M2-O9      | 86.36(8)   | 86.23(11)  | O6v-M2-O9        | 91.03(8)   | 92.09(12)  |
| O3ii-M2-O9      | 90.12(8)   | 90.48(12)  | O1-M2-O10        | 82.57(8)   | 79.35(12)  |
| O8vi-M2-O10     | 86.61(8)   | 86.37(11)  | O6v-M2-O10       | 91.09(8)   | 90.54(11)  |
| O3ii-M2-O10     | 97.05(8)   | 96.94(12)  | O9-M2-O10        | 172.57(8)  | 172.20(10) |
| O4ii-M3-O4iii   | 180.0      | 180.00(12) | O4ii-M3-O5v      | 95.27(8)   | 95.61(13)  |
| O4iii-M3-O5v    | 84.73(8)   | 84.39(13)  | O4ii-M3-O5iv     | 84.73(8)   | 84.39(13)  |
| O4iii-M3-O5iv   | 95.27(8)   | 95.61(13)  | O5iv-M3-O5v      | 180.00(15) | 180.0      |
| O4ii-M3-O10viii | 90.41(8)   | 91.05(12)  | O4iii-M3-O10viii | 89.59(8)   | 88.95(12)  |
| O5v-M3-O10viii  | 86.95(8)   | 86.34(11)  | O5iv-M3-O10viii  | 93.05(8)   | 93.66(11)  |
| O4ii-M3-O10     | 89.59(8)   | 88.95(12)  | O4iii-M3-O10     | 90.41(8)   | 91.05(12)  |
| O5v-M3-O10      | 93.05(8)   | 93.66(11)  | O5iv-M3-O10      | 86.95(8)   | 86.34(11)  |
| O10-M3-O10viii  | 180.0      | 180.00(7)  | M2-O9-M1         | 115.30(9)  | 113.02(12) |
| M3-O10-M2       | 114.37(9)  | 112.78(12) |                  |            |            |

Symmetry codes: i =  $-x, -y, -z$ ; ii =  $-0.5 + x, 0.5 - y, -0.5 + z$ ; iii =  $0.5 - x, 0.5 + y, 0.5 - z$ ; iv =  $1.5 - x, 0.5 + y, 0.5 - z$ ; v =  $-1.5 + x, 0.5 - y, -0.5 + z$ ; vi =  $-1 + x, y, z$ ; vii =  $1 - x, -y, -z$ ; viii =  $-x, 1 - y, -z$ .

Table S7. Selected bond lengths (Å) and bond angles (°) for **8**.

|              |            |              |           |
|--------------|------------|--------------|-----------|
| Ni1-O2i      | 2.020(2)   | Ni1-O4       | 2.007(2)  |
| Ni1-O5       | 2.0321(19) | Ni1-O9       | 2.117(2)  |
| Ni1-O12      | 2.050(2)   | Ni1-O13      | 2.039(2)  |
| Ni2-O3       | 2.040(2)   | Ni2-O6       | 2.024(2)  |
| Ni2-O8ii     | 2.059(2)   | Ni2-O10      | 2.042(2)  |
| Ni2-O13      | 2.023(2)   | Ni2-O14      | 2.128(2)  |
| O4-Ni1-O2i   | 91.31(9)   | O4-Ni1-O5    | 93.49(9)  |
| O2i-Ni1-O5   | 171.77(8)  | O4-Ni1-O13   | 89.84(8)  |
| O2i-Ni1-O13  | 91.13(8)   | O5-Ni1-O13   | 95.56(8)  |
| O4-Ni1-O12   | 178.14(8)  | O2i-Ni1-O12  | 87.29(9)  |
| O5-Ni1-O12   | 87.75(9)   | O13-Ni1-O12  | 91.42(8)  |
| O4-Ni1-O9    | 85.71(9)   | O2i-Ni1-O9   | 86.77(9)  |
| O5-Ni1-O9    | 86.93(8)   | O13-Ni1-O9   | 175.04(8) |
| O12-Ni1-O9   | 92.97(9)   | O13-Ni2-O6   | 96.60(8)  |
| O13-Ni2-O3   | 89.48(8)   | O6-Ni2-O3    | 94.55(9)  |
| O13-Ni2-O10  | 175.81(8)  | O6-Ni2-O10   | 87.07(9)  |
| O3-Ni2-O10   | 88.22(9)   | O13-Ni2-O8ii | 92.30(8)  |
| O6-Ni2-O8ii  | 92.43(9)   | O3-Ni2-O8ii  | 172.56(9) |
| O10-Ni2-O8ii | 89.54(9)   | O13-Ni2-O14  | 88.13(9)  |
| O6-Ni2-O14   | 175.02(9)  | O3-Ni2-O14   | 87.01(10) |
| O10-Ni2-O14  | 88.24(10)  | O8ii-Ni2-O14 | 85.83(10) |

Symmetry codes: i =  $1 + x, y, z$ ; ii =  $x, 1 + y, z$ .

Table S8. Selected bond lengths (Å) and bond angles (°) for **9**.

|              |            |                 |           |
|--------------|------------|-----------------|-----------|
| Ni1-O2i      | 2.201(4)   | Ni1-O2ii        | 2.201(4)  |
| Ni1-O3       | 1.992(4)   | Ni1-O3iii       | 1.992(4)  |
| Ni1-O9       | 2.036(4)   | Ni1-O9iii       | 2.036(4)  |
| Ni2-O2i      | 2.113(4)   | Ni2-O4          | 2.035(4)  |
| Ni2-O9       | 2.082(4)   | Ni2-O10         | 2.084(4)  |
| Ni2-O6iv     | 1.998(5)   | Ni2-O8v         | 2.066(4)  |
| Ni3-O5iv     | 2.007(4)   | Ni3-O5vi        | 2.007(4)  |
| Ni3-O10      | 2.084(4)   | Ni3-O10vii      | 2.084(4)  |
| Ni3-O11      | 2.048(4)   | Ni3-O11vii      | 2.048(4)  |
| O3-Ni1-O3iii | 180.000(1) | O3iii-Ni1-O9    | 85.29(16) |
| O3-Ni1-O9    | 94.71(16)  | O3iii-Ni1-O9iii | 94.71(16) |

|                   |            |                 |            |
|-------------------|------------|-----------------|------------|
| O3-Ni1-O9iii      | 85.29(16)  | O9-Ni1-O9iii    | 180.0(2)   |
| O3iii-Ni1-O2i     | 90.27(16)  | O3-Ni1-O2i      | 89.73(16)  |
| O9-Ni1-O2i        | 79.71(15)  | O9iii-Ni1-O2i   | 100.29(15) |
| O3iii-Ni1-O2ii    | 89.73(16)  | O3-Ni1-O2ii     | 90.27(16)  |
| O9-Ni1-O2ii       | 100.29(15) | O9iii-Ni1-O2ii  | 79.71(15)  |
| O2i-Ni1-O2ii      | 180.000(1) | O6-Ni2-O4       | 175.76(19) |
| O6-Ni2-O8         | 89.31(19)  | O4-Ni2-O8       | 87.23(17)  |
| O6-Ni2-O9         | 87.52(18)  | O4-Ni2-O9       | 90.28(17)  |
| O8-Ni2-O9         | 94.01(16)  | O6-Ni2-O10      | 97.80(18)  |
| O4-Ni2-O10        | 84.72(17)  | O8-Ni2-O10      | 91.10(16)  |
| O9-Ni2-O10        | 172.67(17) | O6-Ni2-O2       | 90.38(18)  |
| O4-Ni2-O2         | 92.84(17)  | O8-Ni2-O2       | 174.79(16) |
| O9-Ni2-O2         | 80.78(15)  | O10-Ni2-O2      | 94.10(16)  |
| O5iv-Ni3-O5vi     | 180.000(2) | O5iv-Ni3-O11vii | 88.1(2)    |
| O5vi-Ni3-O11vii   | 91.9(2)    | O5iv-Ni3-O11    | 91.9(2)    |
| O5vi-Ni3-O11      | 88.1(2)    | O11-Ni3-O11vii  | 180.000(1) |
| O5iv-Ni3-O10vii   | 86.60(17)  | O5vi-Ni3-O10vii | 93.40(17)  |
| O11vii-Ni3-O10vii | 87.71(17)  | O11-Ni3-O10vii  | 92.29(17)  |
| O5iv-Ni3-O10      | 93.40(17)  | O5vi-Ni3-O10    | 86.60(17)  |
| O11vii-Ni3-O10    | 92.29(17)  | O11-Ni3-O10     | 87.71(17)  |
| O10-Ni3-O10vii    | 180.000(1) |                 |            |

Symmetry codes: i =  $-1 + x, -1 + y, z$ ; ii =  $2 - x, 2 - y, 1 - z$ ; iii =  $1 - x, 1 - y, 1 - z$ ; iv =  $x, -1 + y, z$ ; v =  $1 + x, y, z$ ; vi =  $2 - x, 2 - y, 2 - z$ ; vii =  $2 - x, 1 - y, 2 - z$ .

Table S9. Crystallographic data for H<sub>4</sub>L·2DMA·0.5H<sub>2</sub>O.

| H <sub>4</sub> L·2DMA·0.5H <sub>2</sub> O |                                                                |                                                                                                         |                |
|-------------------------------------------|----------------------------------------------------------------|---------------------------------------------------------------------------------------------------------|----------------|
| Empirical formula                         | C <sub>60</sub> H <sub>66</sub> N <sub>4</sub> O <sub>21</sub> | <i>Z</i>                                                                                                | 2              |
| Formula weight                            | 1179.17                                                        | $\rho_{\text{calc}}$ g/cm <sup>3</sup>                                                                  | 1.338          |
| Crystal system                            | Monoclinic                                                     | $\mu$ /mm <sup>-1</sup>                                                                                 | 0.102          |
| Space group                               | <i>C2/c</i>                                                    | <i>F</i> (000)                                                                                          | 1244           |
| <i>a</i> /Å                               | 25.461(12)                                                     | Reflections collected                                                                                   | 5638           |
| <i>b</i> /Å                               | 6.279(2)                                                       | Unique reflections                                                                                      | 2401           |
| <i>c</i> /Å                               | 19.834(6)                                                      | <i>GOF</i> ( <i>F</i> <sup>2</sup> )                                                                    | 1.011          |
| $\beta$ /°                                | 112.59(2)                                                      | <i>R</i> <sub>1</sub> <sup>a</sup> , <i>wR</i> <sub>2</sub> <sup>b</sup> , ( <i>I</i> > 2σ( <i>I</i> )) | 0.0595, 0.1302 |
| <i>V</i> /Å <sup>3</sup>                  | 2927.6(19)                                                     | <i>R</i> <sub>1</sub> <sup>a</sup> , <i>wR</i> <sub>2</sub> <sup>b</sup> , (all data)                   | 0.1627, 0.1923 |

$$R_1^a = \frac{\sum ||F_o| - |F_c||}{\sum |F_o|}, \quad wR_2^b = \left[ \frac{\sum w(F_o^2 - F_c^2)^2}{\sum w(F_o^2)} \right]^{1/2}.$$

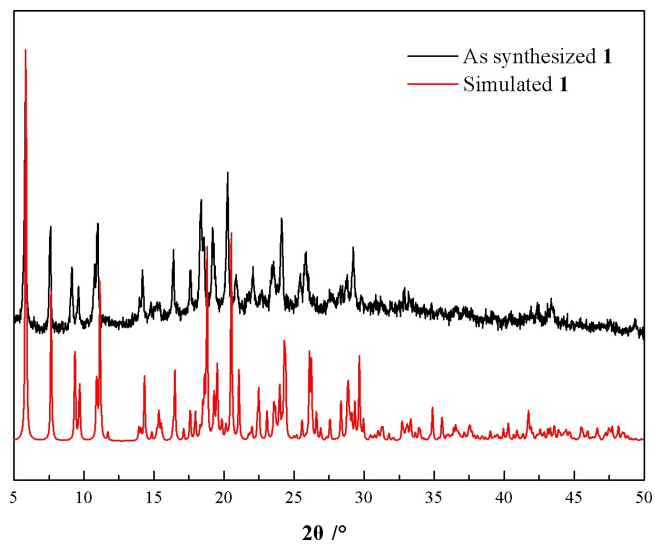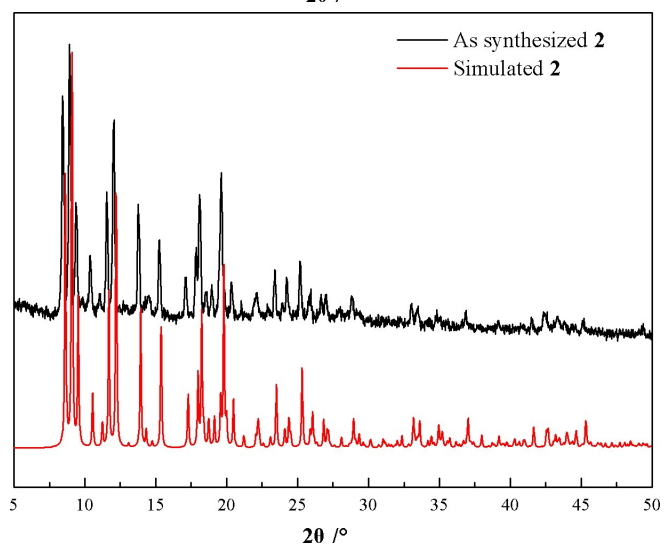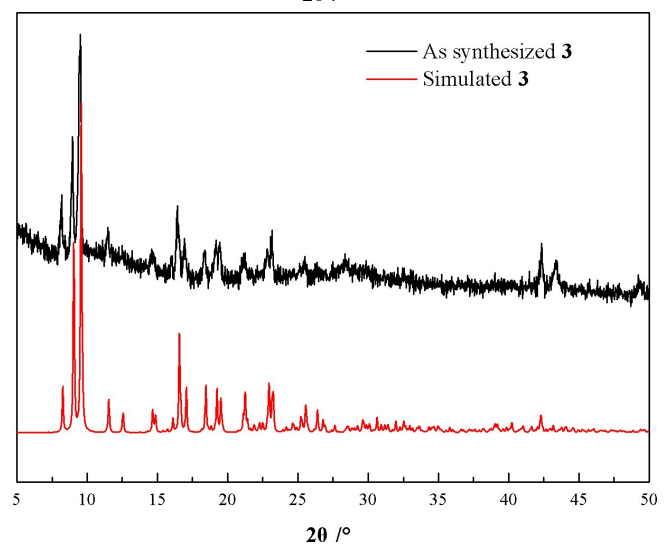

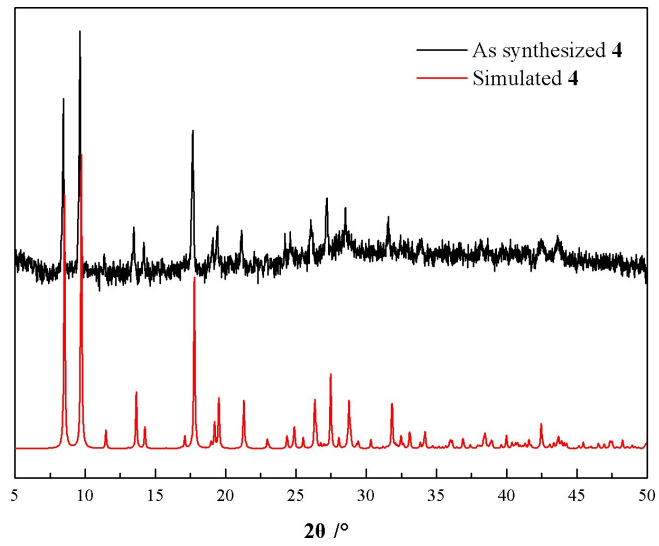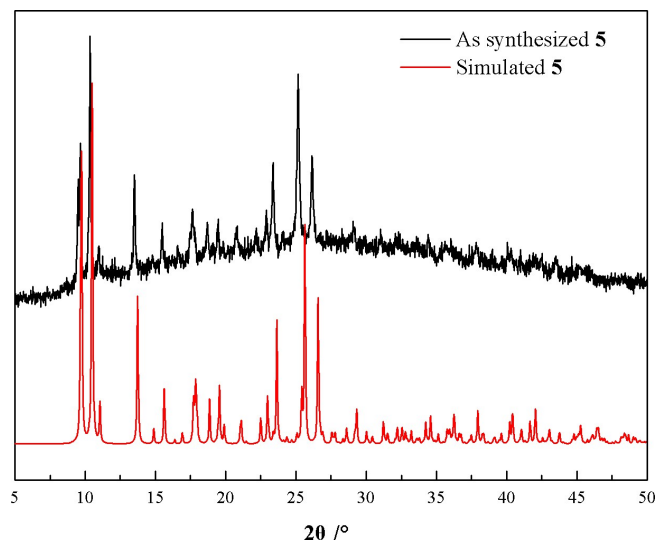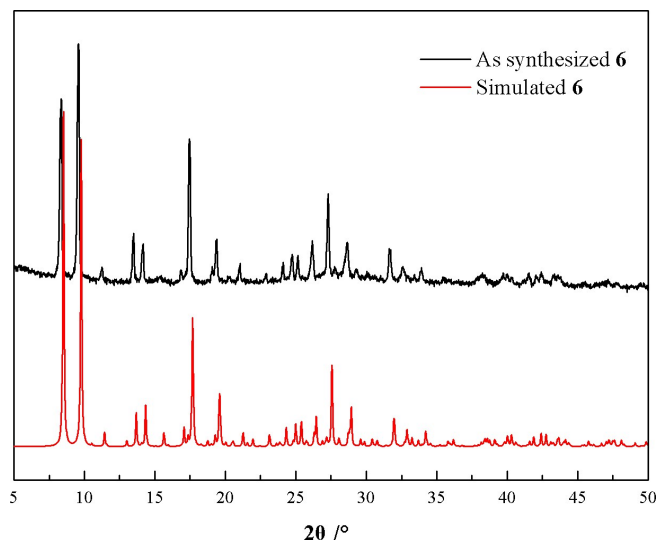



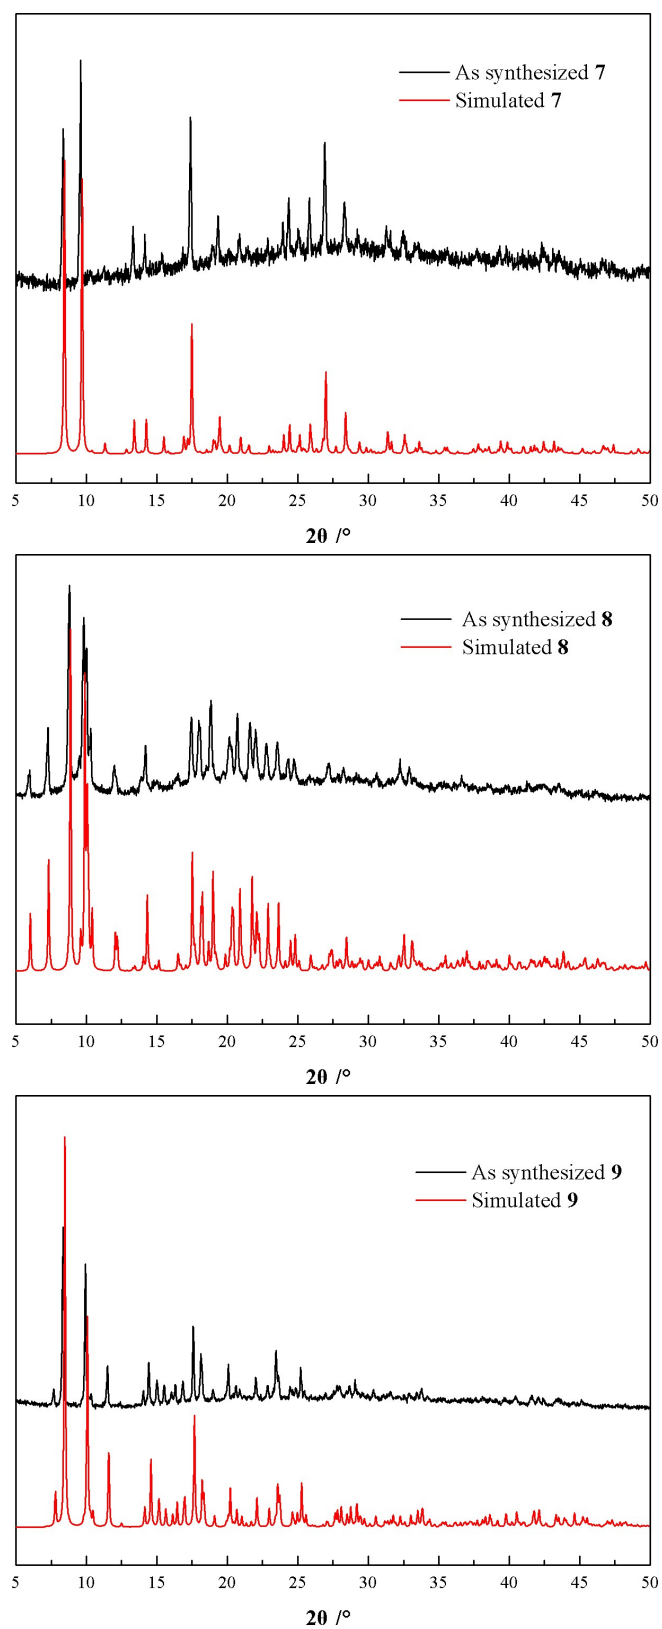

**Fig. S1** The simulated and as-synthesized powder X-ray diffraction patterns of **1-9**.
